# Supplementary material for: Clubs of autocrats: Regional organizations and authoritarian survival
Source: Springer Nature journal article supplement (doi:10.1007/s11558-021-09428-y), 2021-06-10
Supplement: MOESM1 [file 19249712]

## Online Appendix

“Clubs of Autocrats: Regional Organizations and Authoritarian Survival”

Maria Josepha Debre

*The Review of International Organizations*

### Robustness Checks – Replicating Table 1

|                                                                                   |    |
|-----------------------------------------------------------------------------------|----|
| Table A1: Replicating Table 1 with Regional Diffusion .....                       | 2  |
| Table A2: Replicating Table 1 with Time since last Event .....                    | 3  |
| Table A3: Replicating Table 1 without Stratification (Time since last Event)..... | 4  |
| Table A4: Replicating Table 1 with Region Fixed Effects.....                      | 5  |
| Table A5: Replicating Table 1 with Overlap.....                                   | 7  |
| Table A6: Replicating Table 1 with Average Density.....                           | 8  |
| Table A7: Replicating Table 1 with V-Dem Data .....                               | 9  |
| Table A8: Replicating Table 1 with Aggregate Gdp Per Capita .....                 | 10 |

### Additional Material

|                                                                         |    |
|-------------------------------------------------------------------------|----|
| Table A9: Proportional Hazard Assumption Democratization.....           | 11 |
| Table A10: Proportional Hazard Assumption Autocratic Replacements ..... | 11 |
| Table A11: List of Regional Organizations .....                         | 12 |

Table A1: Replicating Table 1 with Regional Diffusion

|                                                          | Democratization             | Autocratic Replacements     |
|----------------------------------------------------------|-----------------------------|-----------------------------|
|                                                          | (1)                         | (2)                         |
| Autocratic Density                                       | <b>-0.0554*</b><br>(0.0281) | 0.00962<br>(0.0254)         |
| Diffusion Regional                                       | -0.00719<br>(0.00640)       | 0.00479<br>(0.00952)        |
| Authority                                                | 0.210<br>(0.482)            | -0.106<br>(0.704)           |
| Hegemon                                                  | 0.534<br>(0.319)            | -0.135<br>(0.278)           |
| Cold War                                                 | 0.577<br>(0.383)            | -0.747<br>(0.484)           |
| Contagion                                                |                             |                             |
| Previous<br>Democratization <sub><i>t-1</i></sub>        | -0.471<br>(0.539)           |                             |
| Previous Autocratic<br>Replacement <sub><i>t-1</i></sub> |                             | <b>-1.052*</b><br>(0.445)   |
| Regime Type                                              |                             |                             |
| Military                                                 | <b>2.112***</b><br>(0.328)  | 0.215<br>(0.335)            |
| Monarchy                                                 | <b>-33.22***</b><br>(0.514) | 0.407<br>(0.496)            |
| Personal                                                 | 0.629<br>(0.393)            | <b>0.739*</b><br>(0.333)    |
| Growth                                                   | <b>-4.314**</b><br>(1.418)  | <b>-6.621***</b><br>(1.546) |
| Resources                                                | -0.0445<br>(0.0532)         | <b>-0.107*</b><br>(0.0424)  |
| <i>N</i>                                                 | 3149                        | 3149                        |

Stratified Cox proportional hazard models with robust standard errors in parentheses and coefficients reported.

\*  $p < 0.05$ , \*\*  $p < 0.01$ , \*\*\*  $p < 0.001$

Table A2: Replicating Table 1 with Time since last Event

|                                                   | Democratization             | Autocratic Replacements     |
|---------------------------------------------------|-----------------------------|-----------------------------|
|                                                   | (1)                         | (2)                         |
| Autocratic Density                                | <b>-0.0699*</b><br>(0.0333) | 0.0327<br>(0.0243)          |
| Authority                                         | 0.0405<br>(0.425)           | 0.000998<br>(0.507)         |
| Hegemon                                           | 0.671<br>(0.407)            | 0.170<br>(0.398)            |
| Cold War                                          | <b>0.733*</b><br>(0.322)    | <b>-1.521***</b><br>(0.446) |
| Contagion                                         |                             |                             |
| Previous<br>Democratization <sub>t-1</sub>        | -0.793<br>(0.584)           |                             |
| Previous Autocratic<br>Replacement <sub>t-1</sub> |                             | -0.924<br>(0.519)           |
| Regime Type                                       |                             |                             |
| Military                                          | <b>2.605***</b><br>(0.412)  | <b>1.134*</b><br>(0.447)    |
| Monarchy                                          | -0.641<br>(1.068)           | -0.301<br>(0.546)           |
| Personal                                          | <b>1.205***</b><br>(0.437)  | <b>1.191**</b><br>(0.372)   |
| Growth                                            | <b>-3.145***</b><br>(0.911) | <b>-4.916***</b><br>(1.082) |
| Resources                                         | 0.0488<br>(0.0718)          | <b>-0.104*</b><br>(0.0441)  |
| <i>N</i>                                          | 3149                        | 3149                        |

Cox proportional hazard models with robust standard errors in parentheses and coefficients reported.  
 \*  $p < 0.05$ , \*\*  $p < 0.01$ , \*\*\*  $p < 0.001$

Table A3: Replicating Table 1 without Stratification (Time since last Event)

|                                                          | Democratization             | Autocratic Replacements     |
|----------------------------------------------------------|-----------------------------|-----------------------------|
|                                                          | (1)                         | (2)                         |
| Autocratic Density                                       | <b>-0.0591*</b><br>(0.0261) | 0.00148<br>(0.0209)         |
| Authority                                                | 0.0694<br>(0.472)           | 0.110<br>(0.500)            |
| Hegemon                                                  | 0.524<br>(0.294)            | 0.250<br>(0.324)            |
| Cold War                                                 | <b>0.872**</b><br>(0.298)   | <b>-0.768*</b><br>(0.360)   |
| Contagion                                                |                             |                             |
| Previous<br>Democratization <sub><i>t-1</i></sub>        | -0.595<br>(0.409)           |                             |
| Previous Autocratic<br>Replacement <sub><i>t-1</i></sub> |                             | <b>-1.002*</b><br>(0.452)   |
| Regime Type                                              |                             |                             |
| Military                                                 | <b>2.736***</b><br>(0.374)  | 0.427<br>(0.338)            |
| Monarchy                                                 | -0.841<br>(1.171)           | 0.455<br>(0.476)            |
| Personal                                                 | <b>1.202***</b><br>(0.361)  | <b>0.791**</b><br>(0.295)   |
| Growth                                                   | <b>-3.493***</b><br>(0.992) | <b>-4.624***</b><br>(1.177) |
| Resources                                                | -0.0279<br>(0.0442)         | <b>-0.0786*</b><br>(0.0364) |
| <i>N</i>                                                 | 3149                        | 3149                        |

Cox proportional hazard models with robust standard errors in parentheses and coefficients reported.  
 \*  $p < 0.05$ , \*\*  $p < 0.01$ , \*\*\*  $p < 0.001$

Table A4: Replicating Table 1 with Region Fixed Effects

|                                                         | Democratization              |                              |                             |                             |                             |                              | Autocratic Replacements     |                             |                             |                              |                             |                             |
|---------------------------------------------------------|------------------------------|------------------------------|-----------------------------|-----------------------------|-----------------------------|------------------------------|-----------------------------|-----------------------------|-----------------------------|------------------------------|-----------------------------|-----------------------------|
|                                                         | (1)                          | (2)                          | (3)                         | (4)                         | (5)                         | (6)                          | (1)                         | (2)                         | (3)                         | (4)                          | (5)                         | (6)                         |
| Autocratic Density                                      | <b>-0.0673**</b><br>(0.0251) | <b>-0.0671**</b><br>(0.0256) | <b>-0.0639*</b><br>(0.0307) | <b>-0.0721*</b><br>(0.0294) | <b>-0.0606*</b><br>(0.0269) | <b>-0.0884**</b><br>(0.0292) | 0.0166<br>(0.0242)          | 0.0224<br>(0.0265)          | 0.0151<br>(0.0211)          | 0.0334<br>(0.0270)           | 0.00730<br>(0.0243)         | 0.00691<br>(0.0318)         |
| Authority                                               | 0.180<br>(0.469)             | 0.156<br>(0.462)             | 0.107<br>(0.488)            | 0.0908<br>(0.506)           | 0.152<br>(0.463)            | 0.00801<br>(0.457)           | -0.0500<br>(0.706)          | 0.0195<br>(0.715)           | -0.0668<br>(0.717)          | 0.197<br>(0.730)             | -0.0659<br>(0.701)          | -0.110<br>(0.707)           |
| Hegemon                                                 | 0.549<br>(0.322)             | 0.542<br>(0.356)             | 0.544<br>(0.350)            | 0.600<br>(0.333)            | 0.621<br>(0.327)            | 0.491<br>(0.343)             | -0.206<br>(0.262)           | -0.191<br>(0.299)           | -0.151<br>(0.269)           | 0.0160<br>(0.293)            | -0.149<br>(0.284)           | -0.206<br>(0.278)           |
| Cold War                                                | 0.641<br>(0.381)             | 0.712<br>(0.380)             | 0.665<br>(0.362)            | 0.669<br>(0.371)            | 0.730<br>(0.374)            | 0.711<br>(0.377)             | -0.830<br>(0.454)           | -0.653<br>(0.536)           | -0.777<br>(0.475)           | -0.638<br>(0.481)            | -0.823<br>(0.499)           | -0.793<br>(0.495)           |
| Contagion<br>Previous<br>Democratization <sub>t-1</sub> | -0.530<br>(0.548)            | -0.475<br>(0.537)            | -0.373<br>(0.441)           | -0.456<br>(0.564)           | -0.475<br>(0.543)           | -0.457<br>(0.537)            |                             |                             |                             |                              |                             |                             |
| Previous<br>Autocratic<br>Replacement <sub>t-1</sub>    |                              |                              |                             |                             |                             |                              | <b>-1.322*</b><br>(0.631)   | <b>-0.875*</b><br>(0.417)   | <b>-1.035*</b><br>(0.425)   | <b>-1.242**</b><br>(0.435)   | <b>-1.091*</b><br>(0.441)   | <b>-1.028*</b><br>(0.430)   |
| Regime Type                                             |                              |                              |                             |                             |                             |                              |                             |                             |                             |                              |                             |                             |
| Military                                                | <b>2.255***</b><br>(0.343)   | <b>2.121***</b><br>(0.340)   | <b>2.180***</b><br>(0.323)  | <b>2.196***</b><br>(0.325)  | <b>2.148***</b><br>(0.316)  | <b>2.193***</b><br>(0.307)   | 0.194<br>(0.331)            | -0.0107<br>(0.351)          | 0.198<br>(0.332)            | 0.0919<br>(0.335)            | 0.263<br>(0.332)            | 0.172<br>(0.328)            |
| Monarchy                                                | <b>-33.12***</b><br>(0.518)  | <b>-34.32***</b><br>(0.539)  | <b>-35.02***</b><br>(1.905) | -36.15<br>(.)               | <b>-32.15***</b><br>(0.515) | <b>-33.12***</b><br>(0.512)  | 0.450<br>(0.501)            | 0.577<br>(0.514)            | 0.388<br>(0.562)            | 0.285<br>(0.526)             | 0.384<br>(0.483)            | 0.423<br>(0.499)            |
| Personal                                                | 0.736*<br>(0.365)            | 0.717<br>(0.367)             | 0.719<br>(0.368)            | 0.731*<br>(0.369)           | 0.599<br>(0.404)            | 0.662<br>(0.363)             | <b>0.702*</b><br>(0.323)    | <b>0.620</b><br>(0.333)     | <b>0.708*</b><br>(0.327)    | <b>0.680*</b><br>(0.329)     | <b>0.829*</b><br>(0.327)    | <b>0.682*</b><br>(0.325)    |
| Growth                                                  | <b>-4.292**</b><br>(1.346)   | <b>-4.195**</b><br>(1.425)   | <b>-4.305**</b><br>(1.415)  | <b>-4.206**</b><br>(1.389)  | <b>-4.371**</b><br>(1.474)  | <b>-3.923**</b><br>(1.307)   | <b>-6.699***</b><br>(1.555) | <b>-6.706***</b><br>(1.549) | <b>-6.639***</b><br>(1.547) | <b>-6.847***</b><br>(1.512)  | <b>-6.427***</b><br>(1.531) | <b>-6.621***</b><br>(1.547) |
| Resources                                               | -0.0488<br>(0.0558)          | -0.0427<br>(0.0532)          | -0.0329<br>(0.0580)         | -0.0345<br>(0.0537)         | -0.0425<br>(0.0522)         | -0.0468<br>(0.0525)          | <b>-0.111*</b><br>(0.0434)  | <b>-0.118*</b><br>(0.0379)  | <b>-0.109*</b><br>(0.0435)  | <b>-0.132***</b><br>(0.0395) | <b>-0.105*</b><br>(0.0418)  | <b>-0.110**</b><br>(0.0408) |

| Region                    |                  |      |                   |                  |                  |                          |      |                   |                   |      |               |                   |
|---------------------------|------------------|------|-------------------|------------------|------------------|--------------------------|------|-------------------|-------------------|------|---------------|-------------------|
| Eurasia                   | 0.408<br>(0.390) |      |                   |                  |                  | 0.564<br>(0.795)         |      |                   |                   |      |               |                   |
| Latin America & Caribbean | 0.198<br>(0.360) |      |                   |                  |                  | <b>0.810*</b><br>(0.409) |      |                   |                   |      |               |                   |
| MENA                      |                  |      | -0.466<br>(1.724) |                  |                  |                          |      | 0.0603<br>(0.579) |                   |      |               |                   |
| Sub-Saharan Africa        |                  |      |                   | 0.111<br>(0.363) |                  |                          |      |                   | -0.664<br>(0.368) |      |               |                   |
| Europe & North America    |                  |      |                   |                  | 0.800<br>(0.468) |                          |      |                   |                   |      | -45.02<br>(.) |                   |
| Asia                      |                  |      |                   |                  |                  | -0.738<br>(0.385)        |      |                   |                   |      |               | -0.282<br>(0.445) |
| <i>N</i>                  | 3149             | 3149 | 3149              | 3149             | 3149             | 3149                     | 3149 | 3149              | 3149              | 3149 | 3149          | 3149              |

Stratified Cox proportional hazard models with robust standard errors in parentheses and coefficients reported. \*  $p < 0.05$ , \*\*  $p < 0.01$ , \*\*\*  $p < 0.001$

Table A5: Replicating Table 1 with Overlap

|                                                             | Democratization             |                             | Autocratic Replacements     |                             |
|-------------------------------------------------------------|-----------------------------|-----------------------------|-----------------------------|-----------------------------|
|                                                             | (1)                         | (2)                         | (3)                         | (4)                         |
| Autocratic Density                                          |                             | <b>-0.0554*</b><br>(0.0260) |                             | 0.0119<br>(0.0291)          |
| Overlap                                                     | -0.218<br>(0.115)           | -0.119<br>(0.119)           | 0.0593<br>(0.0892)          | 0.0349<br>(0.108)           |
| Authority                                                   | 0.120<br>(0.453)            | 0.165<br>(0.456)            | -0.0596<br>(0.711)          | -0.0627<br>(0.713)          |
| Hegemon                                                     | 0.365<br>(0.268)            | 0.601<br>(0.311)            | -0.113<br>(0.237)           | -0.171<br>(0.281)           |
| Cold War                                                    | 0.699<br>(0.386)            | 0.767<br>(0.393)            | -0.806<br>(0.495)           | -0.815<br>(0.497)           |
| Contagion                                                   |                             |                             |                             |                             |
| Previous<br>Democratization <sub><i>t-1</i></sub>           | -0.589<br>(0.550)           | -0.494<br>(0.540)           |                             |                             |
| Previous<br>Autocratic<br>Replacement <sub><i>t-1</i></sub> |                             |                             | <b>-1.042*</b><br>(0.421)   | <b>-1.027*</b><br>(0.428)   |
| Regime Type                                                 |                             |                             |                             |                             |
| Military                                                    | <b>2.176***</b><br>(0.297)  | <b>2.219***</b><br>(0.316)  | 0.171<br>(0.333)            | 0.193<br>(0.330)            |
| Monarchy                                                    | <b>-33.30***</b><br>(0.548) | <b>-32.29***</b><br>(0.516) | 0.451<br>(0.472)            | 0.411<br>(0.493)            |
| Personal                                                    | 0.667<br>(0.365)            | 0.764*<br>(0.364)           | <b>0.708*</b><br>(0.323)    | <b>0.705*</b><br>(0.324)    |
| Growth                                                      | <b>-4.314**</b><br>(1.583)  | <b>-4.380**</b><br>(1.441)  | <b>-6.723***</b><br>(1.531) | <b>-6.670***</b><br>(1.547) |
| Resources                                                   | -0.0586<br>(0.0533)         | -0.0466<br>(0.0540)         | <b>-0.104*</b><br>(0.0433)  | <b>-0.107*</b><br>(0.0424)  |
| <i>N</i>                                                    | 3149                        | 3149                        | 3149                        | 3149                        |

Stratified Cox proportional hazard models with robust standard errors in parentheses and coefficients reported.

\*  $p < 0.05$ , \*\*  $p < 0.01$ , \*\*\*  $p < 0.001$

Table A6: Replicating Table 1 with Average Density

|                                                          | Democratization             | Autocratic Replacements     |
|----------------------------------------------------------|-----------------------------|-----------------------------|
|                                                          | (1)                         | (2)                         |
| Average Density                                          | <b>-0.131**</b><br>(0.0444) | -0.0699<br>(0.0490)         |
| Authority                                                | 0.0235<br>(0.453)           | -0.130<br>(0.709)           |
| Hegemon                                                  | 0.489<br>(0.296)            | 0.125<br>(0.265)            |
| Cold War                                                 | 0.390<br>(0.365)            | -0.752<br>(0.468)           |
| Contagion                                                |                             |                             |
| Previous<br>Democratization <sub><i>t-1</i></sub>        | -0.417<br>(0.536)           |                             |
| Previous Autocratic<br>Replacement <sub><i>t-1</i></sub> |                             | <b>-1.091**</b><br>(0.420)  |
| Regime Type                                              |                             |                             |
| Military                                                 | <b>1.935***</b><br>(0.324)  | 0.0278<br>(0.330)           |
| Monarchy                                                 | <b>-33.06***</b><br>(0.475) | 0.632<br>(0.460)            |
| Personal                                                 | 0.627<br>(0.368)            | <b>0.706*</b><br>(0.327)    |
| Growth                                                   | <b>-4.464***</b><br>(1.351) | <b>-6.888***</b><br>(1.523) |
| Resources                                                | -0.0470<br>(0.0508)         | <b>-0.0939*</b><br>(0.0429) |
| <i>N</i>                                                 | 3149                        | 3149                        |

Stratified Cox proportional hazard models with robust standard errors in parentheses and coefficients reported.

\*  $p < 0.05$ , \*\*  $p < 0.01$ , \*\*\*  $p < 0.001$



Table A7: Replicating Table 1 with V-Dem Data

|                                                          | Democratization                         | Autocratic Replacements                 |
|----------------------------------------------------------|-----------------------------------------|-----------------------------------------|
|                                                          | (1)                                     | (2)                                     |
| Average Density                                          | <b>2.874</b> <sup>*1</sup><br>(1.416)   | 3.096<br>(2.185)                        |
| Authority                                                | 0.217<br>(0.449)                        | -0.0213<br>(0.701)                      |
| Membership <sup>2</sup>                                  | <b>-1.509</b> <sup>*</sup><br>(0.712)   | -0.112<br>(0.877)                       |
| Hegemon                                                  | 0.428<br>(0.338)                        | -0.273<br>(0.255)                       |
| Cold War                                                 | 0.318<br>(0.394)                        | <b>-1.233</b> <sup>**</sup><br>(0.461)  |
| Contagion                                                |                                         |                                         |
| Previous<br>Democratization <sub><i>t-1</i></sub>        | -0.667<br>(0.611)                       |                                         |
| Previous Autocratic<br>Replacement <sub><i>t-1</i></sub> |                                         | <b>-1.027</b> <sup>*</sup><br>(0.448)   |
| Regime Type                                              |                                         |                                         |
| Military                                                 | <b>2.071</b> <sup>***</sup><br>(0.326)  | 0.0900<br>(0.333)                       |
| Monarchy                                                 | <b>-33.19</b> <sup>***</sup><br>(0.531) | 0.527<br>(0.500)                        |
| Personal                                                 | 0.600<br>(0.369)                        | <b>0.695</b> <sup>*</sup><br>(0.337)    |
| Growth                                                   | <b>-4.534</b> <sup>**</sup><br>(1.387)  | <b>-6.702</b> <sup>***</sup><br>(1.542) |
| Resources                                                | -0.0389<br>(0.0517)                     | -0.115 <sup>**</sup><br>(0.0415)        |
| <i>N</i>                                                 | 3126                                    | 3126                                    |

Stratified Cox proportional hazard models with robust standard errors in parentheses and coefficients reported.

\*  $p < 0.05$ , \*\*  $p < 0.01$ , \*\*\*  $p < 0.001$

<sup>1</sup> In this scale of Autocratic density based on the V-Dem data, higher values refer to higher democracy scores. Thus, the hazard of democratization increases with higher democratic density values.

<sup>2</sup> Due to the coding of V-Dem data on a normalized scale from 0-1, I add an additional dummy variable controlling for autocratic RO membership. The hazard of democratization decreases with autocratic RO membership.

Table A8: Replicating Table 1 with Aggregate Gdp Per Capita

|                                                          | Democratization             | Autocratic Replacements     |
|----------------------------------------------------------|-----------------------------|-----------------------------|
|                                                          | (1)                         | (2)                         |
| Average Density                                          | <b>-0.0977*</b><br>(0.0444) | -0.0698<br>(0.0509)         |
| Authority                                                | 0.139<br>(0.545)            | -0.389<br>(0.824)           |
| Aggregate gdp (log)                                      | 0.185<br>(0.265)            | -0.126<br>(0.246)           |
| Hegemon                                                  | 0.566<br>(0.368)            | -0.238<br>(0.322)           |
| Cold War                                                 | 0.383<br>(0.494)            | -0.825<br>(0.490)           |
| Contagion                                                |                             |                             |
| Previous<br>Democratization <sub><i>t-1</i></sub>        | -1.114<br>(0.710)           |                             |
| Previous Autocratic<br>Replacement <sub><i>t-1</i></sub> |                             | -0.594<br>(0.399)           |
| Regime Type                                              |                             |                             |
| Military                                                 | <b>2.046***</b><br>(0.351)  | -0.192<br>(0.383)           |
| Monarchy                                                 | <b>-31.18***</b><br>(0.623) | 0.412<br>(0.534)            |
| Personal                                                 | 0.412<br>(0.449)            | 0.567<br>(0.350)            |
| Growth                                                   | <b>-4.713**</b><br>(1.776)  | <b>-6.948***</b><br>(1.611) |
| Resources                                                | -0.0474<br>(0.0589)         | <b>-0.0994*</b><br>(0.0465) |
| <i>N</i>                                                 | 2527                        | 2527                        |

Stratified Cox proportional hazard models with robust standard errors in parentheses and coefficients reported.  
 \*  $p < 0.05$ , \*\*  $p < 0.01$ , \*\*\*  $p < 0.001$

Table A9: Proportional Hazard Assumption Democratization

| rho                                     |          | chi2 | df | Prob>chi2 |
|-----------------------------------------|----------|------|----|-----------|
| Autocratic Density                      | -0.01136 | 0.02 | 1  | 0.8788    |
| Authority                               | 0.09474  | 0.97 | 1  | 0.3248    |
| Hegemon                                 | 0.06213  | 0.47 | 1  | 0.4942    |
| Contagion_dem                           | -0.05283 | 0.29 | 1  | 0.5929    |
| Contagion_aut                           | 0.14066  | 2.67 | 1  | 0.1020    |
| Regime Type Military                    | -0.09683 | 1.23 | 1  | 0.2682    |
| Regime Type Monarchy                    | -0.02718 | 0.40 | 1  | 0.5275    |
| Regime Type Party<br>(omitted category) | .        | .    | 1  | .         |
| Regime Type Personal                    | -0.15634 | 3.05 | 1  | 0.0805    |
| Growth                                  | -0.03899 | 0.11 | 1  | 0.7404    |
| Resources                               | -0.12779 | 1.37 | 1  | 0.2419    |
| Global Test                             |          | 7.27 | 10 | 0.6999    |

Table A10: Proportional Hazard Assumption Autocratic Replacements

| rho                                     |          | chi2 | df | Prob>chi2 |
|-----------------------------------------|----------|------|----|-----------|
| Autocratic Density                      | 0.15245  | 2.06 | 1  | 0.1516    |
| Authority                               | 0.15782  | 2.46 | 1  | 0.1169    |
| Hegemon                                 | -0.16945 | 2.80 | 1  | 0.0943    |
| Contagion_dem                           | -0.21373 | 6.76 | 1  | 0.0093    |
| Contagion_aut                           | 0.03876  | 0.10 | 1  | 0.7522    |
| Regime Type Military                    | 0.01810  | 0.02 | 1  | 0.8964    |
| Regime Type Monarchy                    | 0.01583  | 0.02 | 1  | 0.8880    |
| Regime Type Party<br>(omitted category) |          | .    | 1  | .         |
| Regime Type Personal                    | -0.04387 | 0.17 | 1  | 0.6843    |
| Growth                                  | 0.06950  | 0.35 | 1  | 0.5550    |
| Resources                               | 0.08776  | 0.43 | 1  | 0.5110    |
| Global Test                             |          | 8.63 | 10 | 0.5674    |

Table A11: List of Regional Organizations<sup>3</sup>

| Name                                                                                                                                                                                              | Acronym        | Founded (Died) | Autocratic Density <sup>4</sup> |
|---------------------------------------------------------------------------------------------------------------------------------------------------------------------------------------------------|----------------|----------------|---------------------------------|
| African and Malagasy Union (succeeded by OCAM)                                                                                                                                                    | AMU/UAMCE      | 1961 (1965)    | -5,406                          |
| African Union                                                                                                                                                                                     | AU             | 2001           | 1,193                           |
| Andean Community                                                                                                                                                                                  | Andean         | 1996           | 7,021                           |
| Arab Cooperation Council                                                                                                                                                                          | ACC            | 1989 (1990)    | -6,000                          |
| Arab Maghreb Union                                                                                                                                                                                | AMU            | 1989           | -4,836                          |
| Arctic Council                                                                                                                                                                                    | Arctic         | 1996           | 9,238                           |
| Asia -Pacific Economic Cooperation                                                                                                                                                                | APEC           | 1989           | 5,331                           |
| Asian and Pacific Council                                                                                                                                                                         | ASPAC          | 1966 (1973)    | 2,389                           |
| Association of Caribbean States                                                                                                                                                                   | ACS            | 1994           | n.A. <sup>5</sup>               |
| Association of South East Asian Nations                                                                                                                                                           | ASEAN          | 1967           | -1,659                          |
| Association of South-East Asia (succeeded by ASEAN)                                                                                                                                               | ASA            | 1961 (1967)    | 2,667                           |
| Bay of Bengal Initiative for Multi-Sectoral Technical and Economic Cooperation                                                                                                                    | BIMSTEC        | 1997           | 3,167                           |
| Benelux Union                                                                                                                                                                                     | Benelux        | 1958           | 9,950                           |
| Bolivarian Alliance for the Peoples of Our America                                                                                                                                                | ALBA           | 2004           | 4,100                           |
| Caribbean Community                                                                                                                                                                               | CARICOM        | 1973           | 2,111                           |
| Central Africa Economic and Monetary Community                                                                                                                                                    | CEMAC          | 1994           | -2,035                          |
| Central African Customs and Economic Union (succeeded by CEMAC)                                                                                                                                   | UDEAC          | 1964 (1998)    | -6,073                          |
| Central American Integration System                                                                                                                                                               | SICA           | 1991           | 7,786                           |
| Central Asian Cooperation Organization (2000) (formerly Central Asian Commonwealth (1991), Central Asian Economic Union (1994) & Central Asian Economic Cooperation (1998)) (merged with EurAsEC) | CAC/ CAEU/CAEC | 1991 (2005)    | -3,665                          |
| Central Treaty Organization                                                                                                                                                                       | CENTO          | 1955 (1979)    | 0,384                           |
| Collective Security Treaty Organization                                                                                                                                                           | CSTO           | 2002           | -1,952                          |
| Common Market for Eastern and Southern Africa                                                                                                                                                     | COMESA         | 1994           | 0,187                           |
| Commonwealth of Independent States                                                                                                                                                                | CIS            | 1991           | -1,431                          |
| Commonwealth of Independent States Collective Security Treaty (succeeded by CSTO)                                                                                                                 | CST            | 1992 (2002)    | -2,639                          |
| Community of Sahel-Saharan States                                                                                                                                                                 | CEN-SAD        | 1998           | 0,633                           |
| Council of Arab Economic Unity                                                                                                                                                                    | CAEU           | 1957           | -6,346                          |
| Council of Europe                                                                                                                                                                                 | CE             | 1949           | 8,166                           |
| Council of the Baltic Sea States                                                                                                                                                                  | CBSS           | 1992           | 8,953                           |
| East African Community                                                                                                                                                                            | EAC            | 2000           | 1,009                           |
| Economic Community of Central African States                                                                                                                                                      | ECCAS          | 1981           | -3,132                          |
| Economic Community of the Great Lakes Countries                                                                                                                                                   | CEPGL          | 1976           | -3,714                          |
| Economic Community of West African States                                                                                                                                                         | ECOWAS         | 1975           | -2,006                          |

<sup>3</sup> Data on membership and accession dates based on Correlates of War IGO v3 Dataset.

<sup>4</sup> Density values (polity) averaged over RO lifecycle, -10 – 5 signify autocratic, 6-10 democratic.

<sup>5</sup> Majority of member states not covered by polity due to size.

|                                                                          |                  |             |                   |
|--------------------------------------------------------------------------|------------------|-------------|-------------------|
| Economic Cooperation Organization                                        | ECO              | 1985        | -2,883            |
| Entente Council                                                          | Entente          | 1959        | -3,817            |
| Eurasian Economic Community                                              | EurAseC/<br>EAEC | 2000        | -3,152            |
| European Coal and Steel Community                                        | ECSC             | 1952 (2002) | 9,654             |
| European Community (succeeded by EU)                                     | EEC              | 1958 (1992) | 9,702             |
| European Union                                                           | EU               | 1993        | 9,714             |
| GUAM Organization for Democracy and Economic Development                 | GUAM             | 2001        | 3,500             |
| Gulf Cooperation Council                                                 | GCC              | 1981        | -8,672            |
| Gulf of Guinea Commission                                                | GGC              | 1999        | -1,125            |
| Indian Ocean Commission                                                  | IOC              | 1982        | 7,184             |
| Intergovernmental Authority on Development                               | IGAD             | 1986        | -3,099            |
| Latin American and the Caribbean Economic System                         | SELA             | 1975        | 3,861             |
| Latin American Integration Association                                   | LAIA             | 1980        | 4,836             |
| League of Arab States                                                    | LAS              | 1945        | -5,929            |
| Mano River Union                                                         | MRU              | 1973        | -2,709            |
| Mekong-Ganga Cooperation Scheme                                          | MGC              | 2000        | -0,773            |
| Nordic Council                                                           | NC               | 1952        | 10,000            |
| North Atlantic Treaty Organization                                       | NATO             | 1949        | 9,148             |
| Organisation of Eastern Caribbean States                                 | OECS             | 1981        | n.A. <sup>5</sup> |
| Organization for Security and Cooperation in Europe                      | OSCE             | 1975        | 5,717             |
| Organization of African Unity (succeeded by AU)                          | OAU              | 1963 (2002) | -3,553            |
| Organization of American States                                          | OAS              | 1948        | 2,527             |
| Organization of Black Sea Economic Cooperation                           | BSEC             | 1992        | 5,758             |
| Organization of Central American States (succeeded by SICA)              | ODECA/<br>OCAS   | 1951 (1973) | -0,448            |
| Pacific Island Forum                                                     | PIF              | 1971        | 10,000            |
| Shanghai Cooperation Organization                                        | SCO              | 2001        | -3,100            |
| South Asian Association for Regional Cooperation                         | SAARC            | 1985        | 4,054             |
| Southeast Asia Treaty Organization                                       | SEATO            | 1954 (1977) | 5,545             |
| Southern African Customs Union                                           | SACU             | 1969        | 1,938             |
| Southern African Development Community                                   | SADC             | 1992        | 3,154             |
| Southern African Development Coordination Conference (succeeded by SADC) | SADCC            | 1980 (1992) | -3,761            |
| Southern Common Market                                                   | MERCOSUR         | 1991        | 8,183             |
| Union for the Mediterranean                                              | UfM              | 1995        | 7,174             |
| Union of South American Nations                                          | UNASUR           | 2004        | 7,600             |
| Warsaw Treaty Organization (succeeded by CIS)                            | WTO              | 1955 (1991) | -6,892            |
| West Africa Economic and Monetary Union                                  | UEMOA            | 1994        | 1,767             |
| West African Economic Community (succeeded by UEMOA)                     | CEAO             | 1973 (1994) | -5,137            |
